# Supplementary material
Source: PubMed Central journal article supplement (PMC9107629)
Supplement: NIHMS1582600-supplement-1.pdf [file NIHMS1582600-supplement-1.pdf]

**Colour Charges Form – Nature Research Journals****COLOUR FIGURES**

Nature Research Journals are committed to providing authors with the highest quality figures, and we use the latest techniques to achieve this reproduction. We therefore charge authors a fee of €360/ £320/ \$430 per figure for reproduction in full colour. Please note that we do not offer a colour online only option.

No author will be denied publication based on his/her inability to meet these charges. If we agree that colour is essential but you are unable to meet the costs, they may be able to be waived if you explain the circumstances before your paper is published. Otherwise you will be billed after publication.

Authors will be charged in the currency that is most applicable to the corresponding author's address. (Please note that in EU countries VAT will be added if you are unable to provide us with your VAT details below.)

**PLEASE COMPLETE AND SIGN THE SECTION BELOW AND RETURN A COPY OF THIS SHEET TO THE EDITORIAL ASSISTANT BY REPLYING TO THE EMAIL, WHERE THE LINK TO THIS FORM CAN BE FOUND. PLEASE NOTE: THERE ARE 2 PAGES TO THE FORM.**

Corresponding Author Name **Charles Chiu**

---

Journal

**Nature Biotechnology**

---

Manuscript Reference Number:

**NBT-TR50115B**

---

Contact Name (please note: this will be the person that will process the invoice)

**Charles Chiu**

---

Contact email address (please note: this is where the invoice will be sent)

**charles.chiu@ucsf.edu**

---

Contact Address:

Department: **Laboratory Medicine** Institution/Organisation **UCSF**

First line of your address: **2155 26th Ave.**

---

Second line of your address: \_\_\_\_\_

City: **San Francisco** Postal Code: **94116** Country: **USA**

---

Please tick the options that do apply.

I agree to pay the sum requested in the event that colour is considered essential.

I am unable to meet the costs of colour for the following reason:

I am a VAT registered paying member of the EU

If you ticked the VAT box above, you must provide your VAT number below

**VAT NUMBER**

|  |  |  |  |  |  |  |  |  |  |  |  |  |  |  |  |  |  |  |  |  |
|--|--|--|--|--|--|--|--|--|--|--|--|--|--|--|--|--|--|--|--|--|
|  |  |  |  |  |  |  |  |  |  |  |  |  |  |  |  |  |  |  |  |  |
|--|--|--|--|--|--|--|--|--|--|--|--|--|--|--|--|--|--|--|--|--|

SIGNED: \_\_\_\_\_

NAME IN BLOCK LETTERS: Charles Chiu
